# Supplementary material for: Unveiling the multifunctional roles of hitherto known capping ligand oleic acid as blue emitter and sensitizer in tuning the emission colour to white in red-emitting phosphors
Source: Royal Society of Chemistry journal article supplement (doi:10.1039/c8cp02954g), 2018-01-01
Supplement: c8cp02954g1.pdf [file c8cp02954g1.pdf]

## Electronic Supplementary Information

# Unveiling the Multifunctional Roles of Hitherto Known Capping Ligand, Oleic Acid, as Blue Emitter and Sensitizer in Tuning the Emission Colour to White in Red-emitting Phosphors

S. Sekar<sup>a</sup>, J. George Muller<sup>a</sup>, J. Karthikeyan<sup>a,b</sup>, P. Murugan<sup>a,b</sup>,  
N. Lakshminarasimhan<sup>a,b,\*</sup>

<sup>a</sup>Functional Materials Division  
CSIR-Central Electrochemical Research Institute  
Karaikudi 630 003, Tamil Nadu, India.

<sup>b</sup>Academy of Scientific and Innovative Research  
CSIR Campus, Chennai 600 113, Tamil Nadu, India.

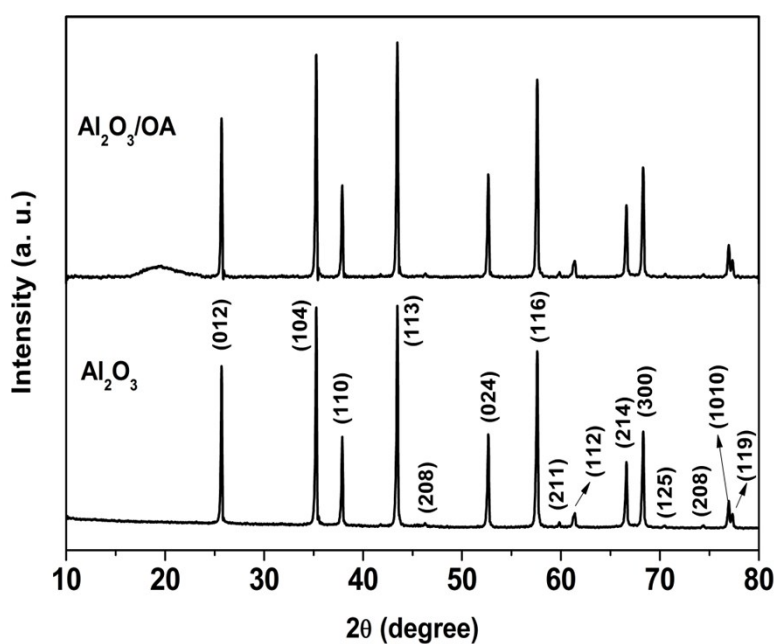

**Fig. S1.** Powder XRD patterns of  $\text{Al}_2\text{O}_3$  obtained by combustion synthesis and OA-modified  $\text{Al}_2\text{O}_3$  by hydrothermal method. All the reflections indexed based on the standard pattern ICDD (#00-046-1212) confirm the formation of  $\text{Al}_2\text{O}_3$  with corundum structure with rhombohedral symmetry.

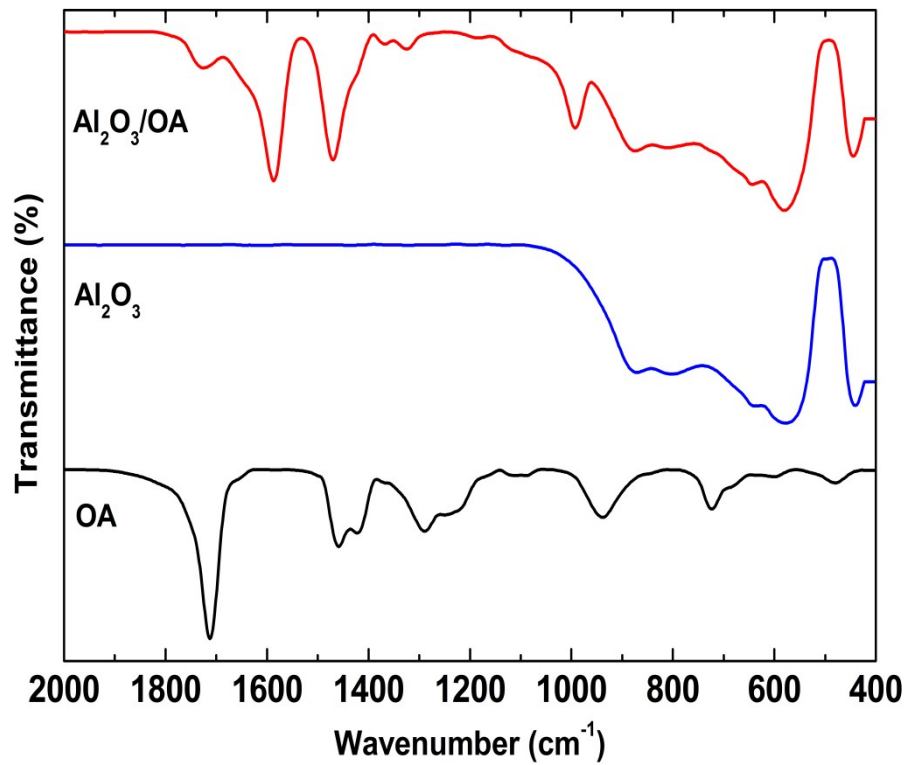

Fig. S2. FT-IR spectra of OA, Al<sub>2</sub>O<sub>3</sub> and Al<sub>2</sub>O<sub>3</sub>/OA.

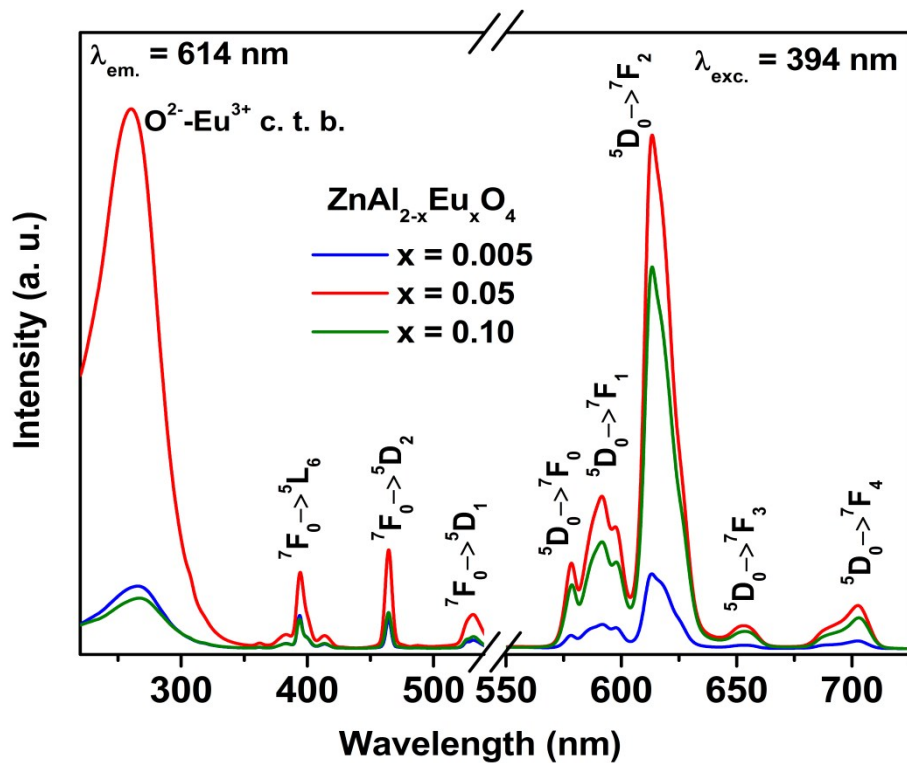

**Fig. S3.** Room temperature PL excitation ( $\lambda_{em.} = 614$  nm) and emission ( $\lambda_{exc.} = 394$  nm) spectra of  $ZnAl_{2-x}Eu_xO_4$  samples revealing the different excitation and emission transitions of  $Eu^{3+}$ .

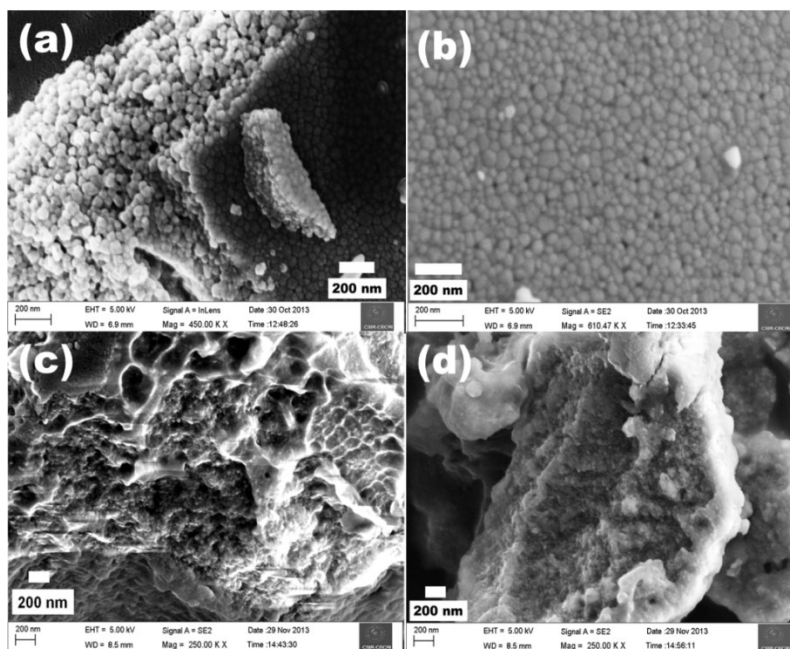

**Fig. S4.** FE-SEM images of (a), (b)  $ZnAl_2O_4$  and (c), (d)  $ZnAl_2O_4/OA$ .

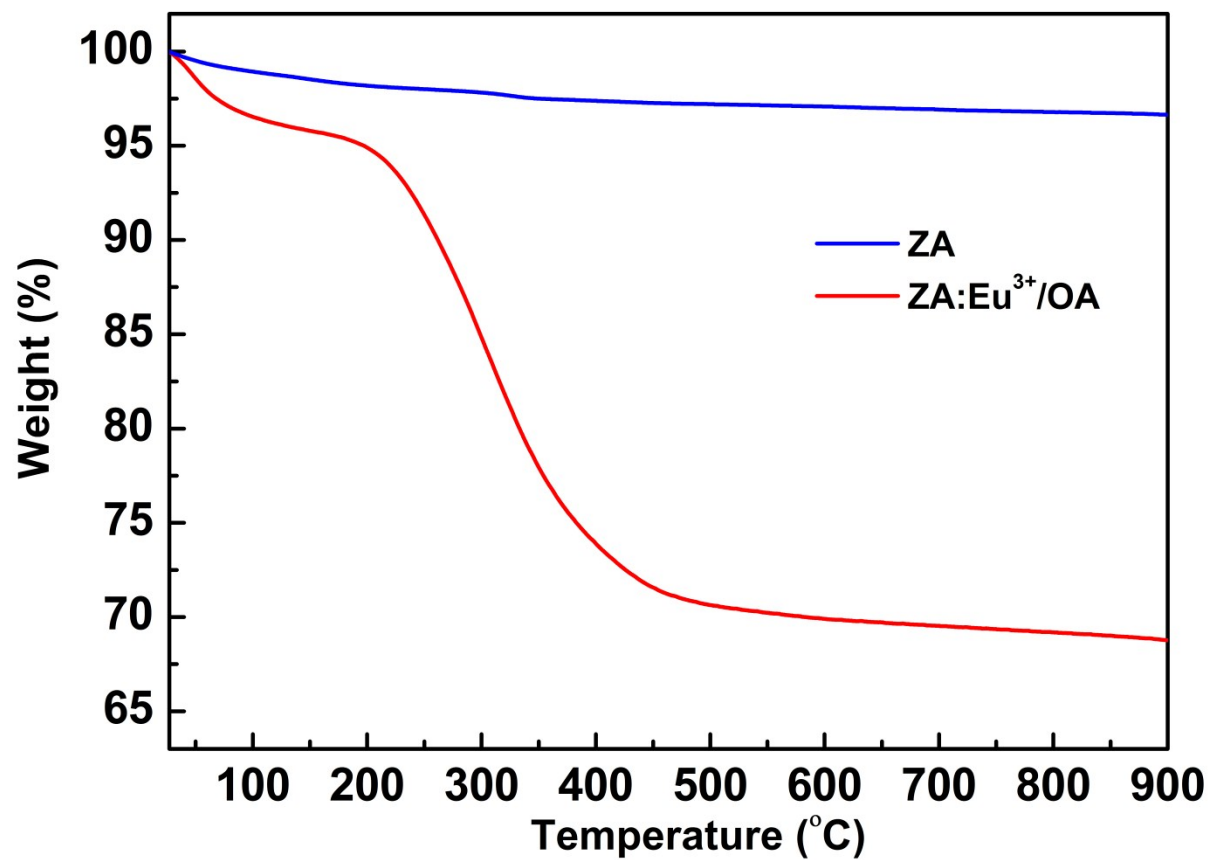

Fig. S5. TGA traces of  $\text{ZnAl}_2\text{O}_4$  and  $\text{ZnAl}_{1.995}\text{Eu}_{0.005}\text{O}_4/\text{OA}$ .

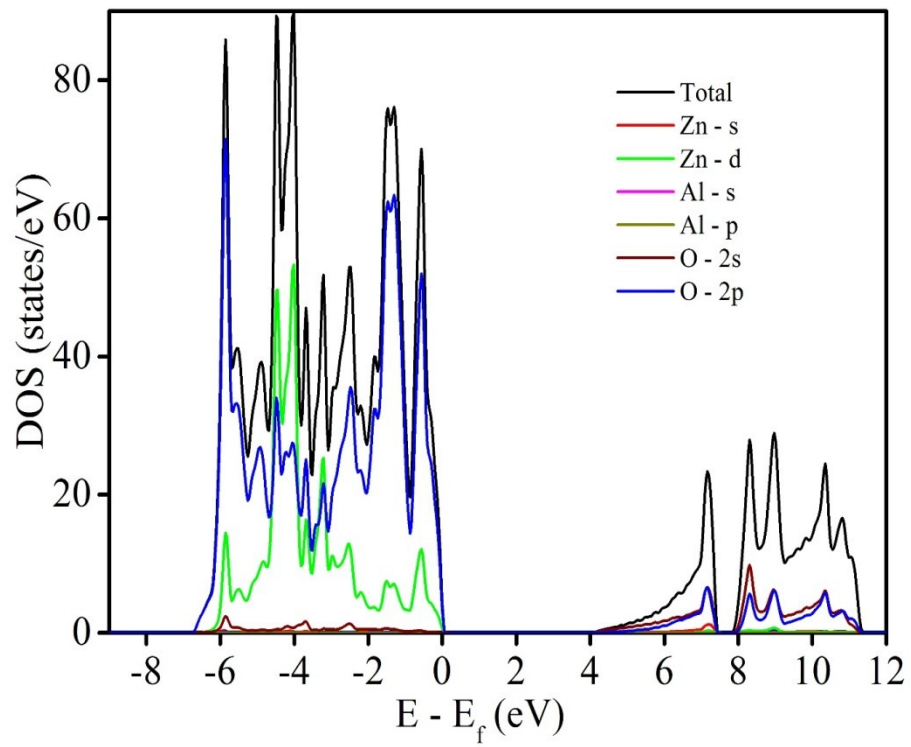

**Fig. S6.** The DOS of bulk ZnAl<sub>2</sub>O<sub>4</sub>.

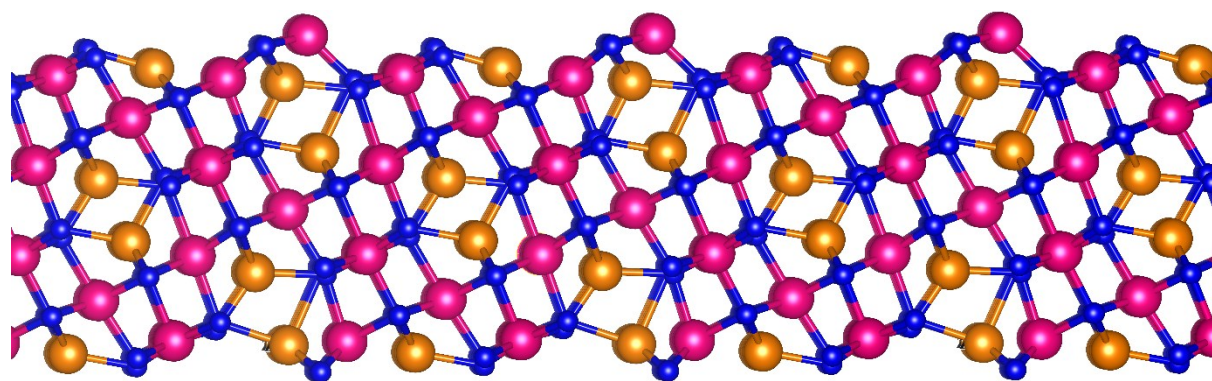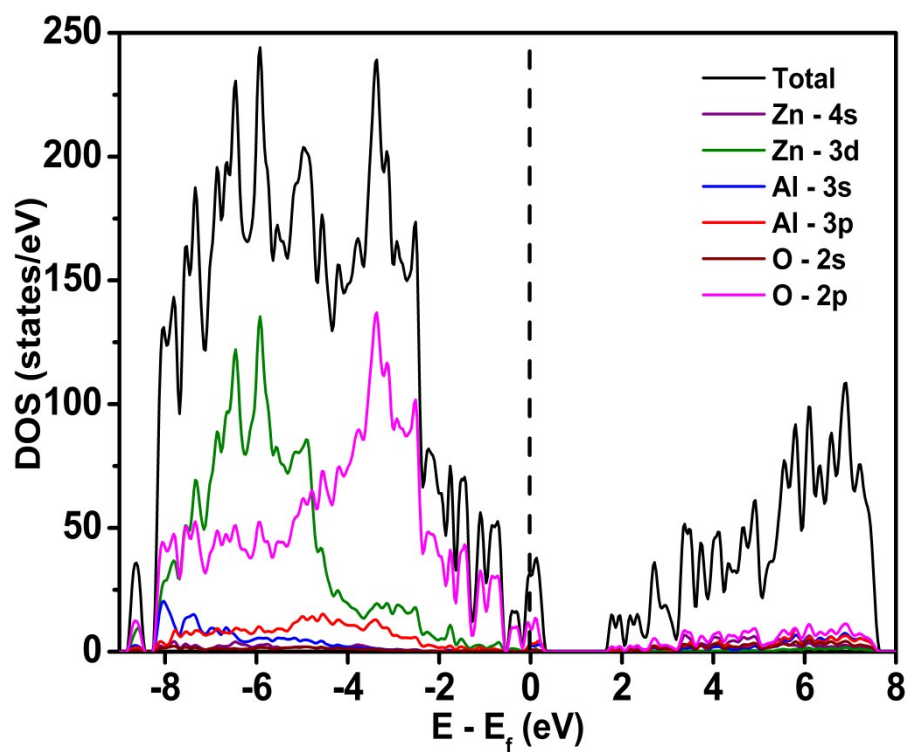

**Fig. S7.** The optimized structure of (311) surface of  $\text{ZnAl}_2\text{O}_4$ . Here, orange, pink, and blue, coloured balls represent Zn, Al, and O atoms, respectively. The DOS of (311) surface of  $\text{ZnAl}_2\text{O}_4$  is also shown.

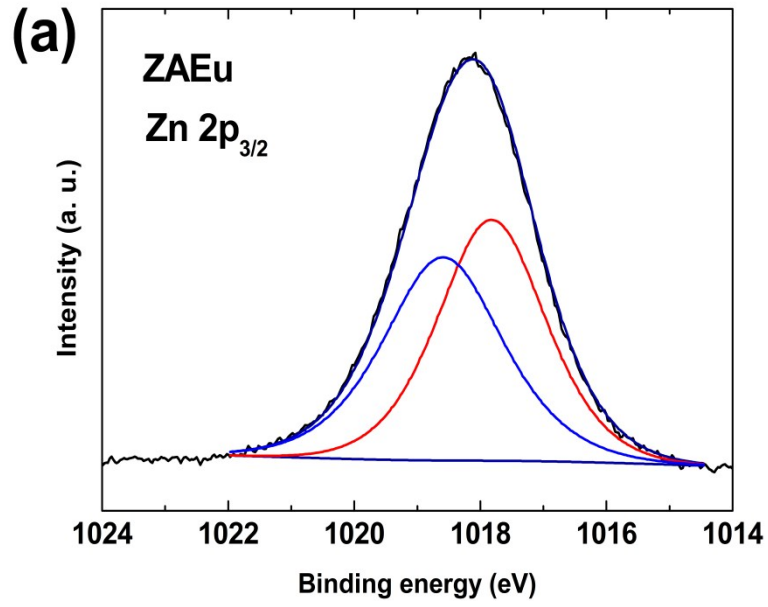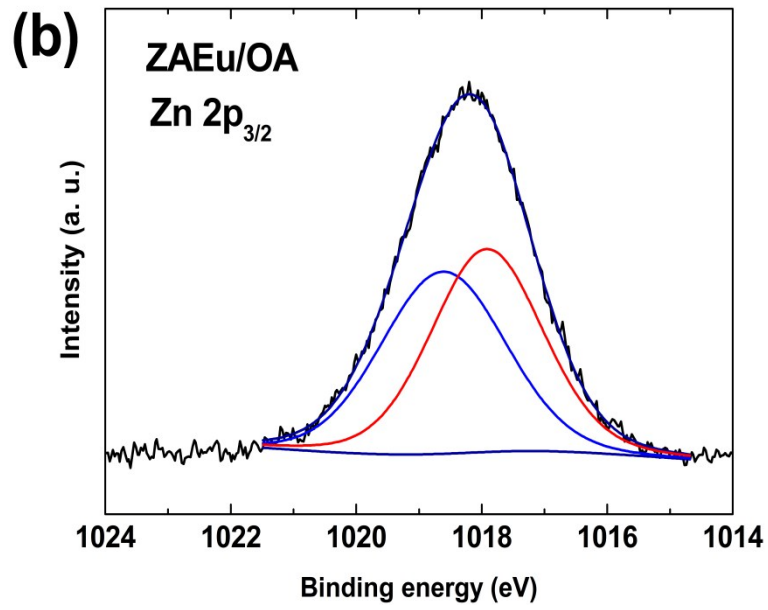

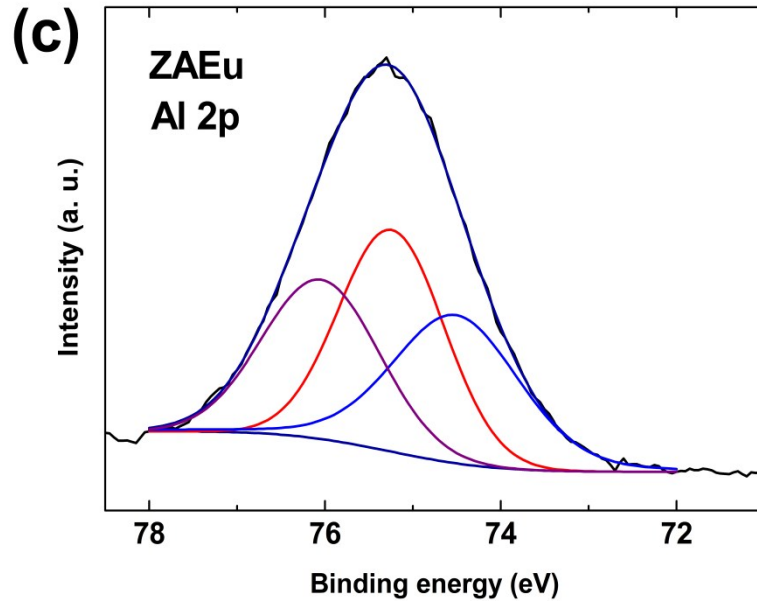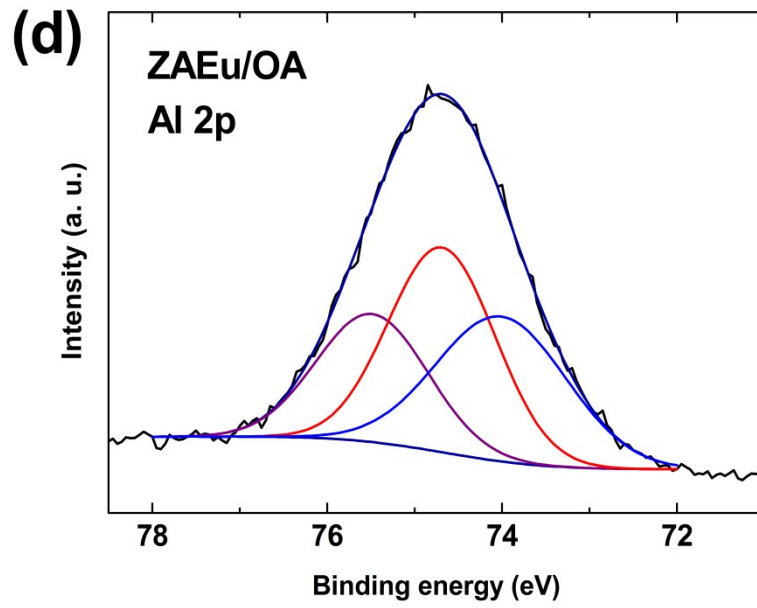



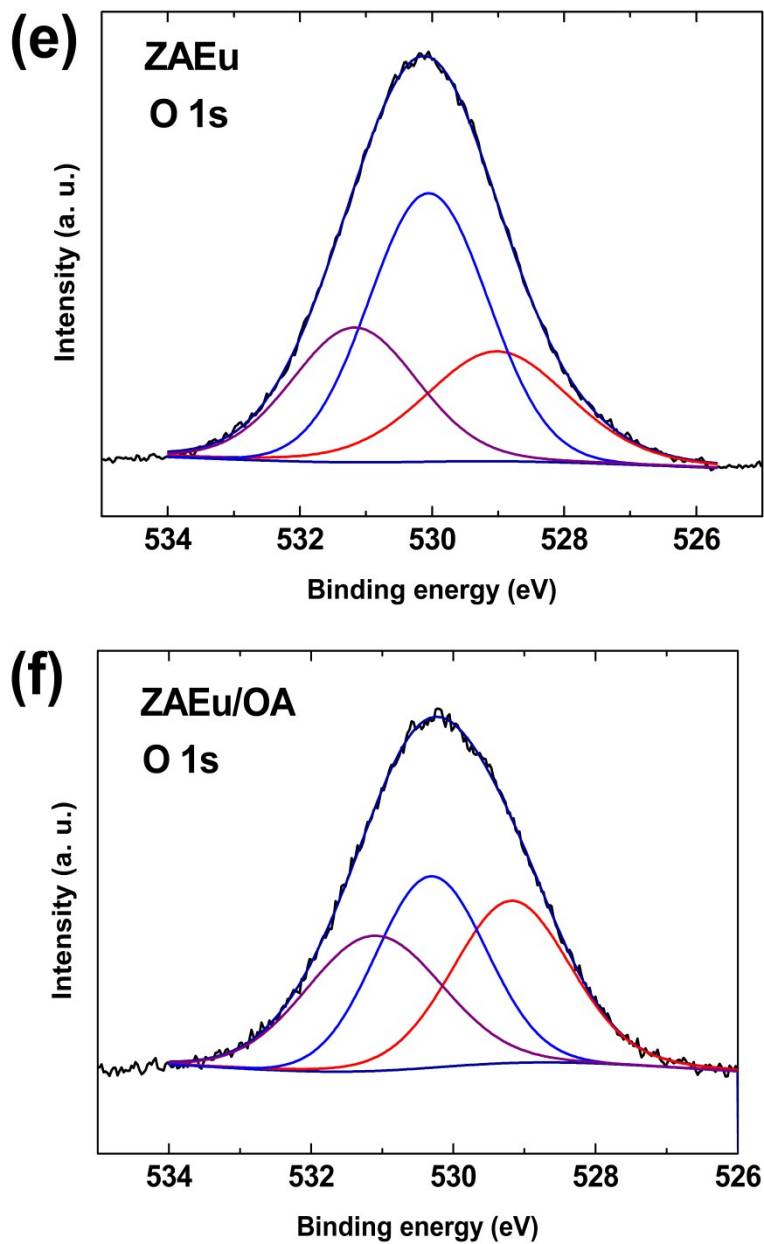

**Fig. S8.** XPS core level spectra of Zn-2p (a and b), Al-2p (c and d) and O-1s (e and f) in pristine ZA:Eu<sup>3+</sup> and ZA:0.01Eu<sup>3+</sup>/OA samples.

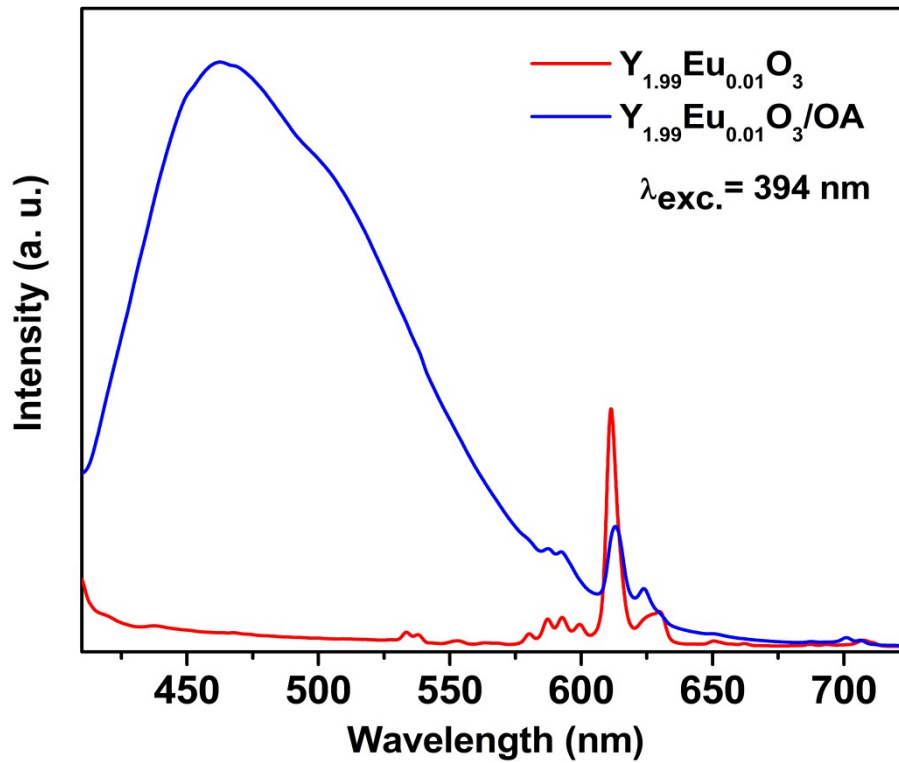

**Fig. S9.** Room temperature PL emission spectra of (a) pristine and OA-modified  $Y_2O_3:Eu^{3+}$  and (b) OA and OA-modified  $Al_2O_3$ . The spectrum of OA was recorded in solution state.
